# Supplementary material for: Unusually Long Palindromes Are Abundant in Mitochondrial Control Regions of Insects and Nematodes
Source: PubMed Central journal article supplement (PMC1762429; doi:10.1371/journal.pone.0000110), 2006-12-20

# CLUSTAL X - MULTIPLE SEQUENCE ALIGNMENT of short palindromes found in vertebrates

Page 1 of 3

Bird species showing contraction of palindromes

|                     |                                      |    |
|---------------------|--------------------------------------|----|
| Gallus_sonneratii   | -----TTTTTTAAAAACATTTTTTAAAAAA-----  | 25 |
| Gallus_lafayettei   | -----TTTTTTAAAAACATTTTTTAAAAAA-----  | 25 |
| Gallus_gallus1      | -----TTTTTTAAAAACATTTTTTAAAAAA-----  | 25 |
| Syrmaticus_elliotti | -----TTTTTTAAAAACATTTTTTAAAAAA-----  | 25 |
| Gallus_varius1      | ATTTGTTTTTTAAAAACATTTTTTAAAAAACTAAAT | 37 |

Fish species showing contraction of palindrome

|                           |                              |    |
|---------------------------|------------------------------|----|
| Raja_porosa2              | -----TAAGAATTCTTA-----       | 12 |
| Mitu_tomentosa            | -----CAAAAAAATTTTTTTG-----   | 16 |
| Motacilla_madaraspatensis | -----AATTAATATTAATT-----     | 14 |
| Pseudobagrus_tenuis       | -----ATTATGCATAAT-----       | 12 |
| Gallus_varius2            | -----TTGTTAATTAACAA-----     | 14 |
| Loxodonta_cyclotis        | -----TGCTTATAAGCA-----       | 12 |
| Sebastes_schlegeli        | -----AATACATATATGTATT-----   | 16 |
| Cyprinodon_bovinus1       | -----ATAATACATATATGTATT----- | 20 |

|                               |                        |    |
|-------------------------------|------------------------|----|
| Diomedea_melanophris          | -----TACATTAATGTA----- | 12 |
| Thalassarche_steadii          | -----TACATTAATGTA----- | 12 |
| Jordanella_floridae           | -----TACATATATGTA----- | 12 |
| Cyprinodon_meeki3             | -----TACATATATGTA----- | 12 |
| Cyprinodon_atrorus2           | -----TACATATATGTA----- | 12 |
| Apodemus_mystacinus           | -----TACATATATGTA----- | 12 |
| Altalamprologus_calvus        | -----TACATATATGTA----- | 12 |
| Altalamprologus_compressiceps | -----TACATATATGTA----- | 12 |

ruler 1.....10.....20.....30.....

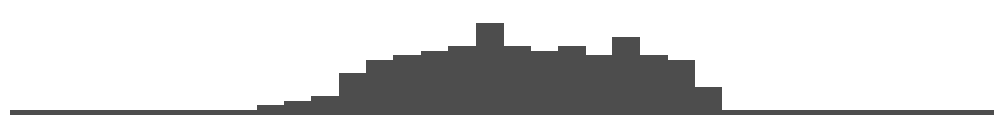

CLUSTAL X (1.81) MULTIPLE SEQUENCE ALIGNMENT of short and long palindomes found in veterbrates

Page 2 of 3

|                             |                                        |    |
|-----------------------------|----------------------------------------|----|
| Thunnus_obesus              | -----TACATATATGTA-----                 | 12 |
| Milvus_milvus1              | -----ACATATATATGT-----                 | 12 |
| Zapus_hudsonius             | -----ACATATATATGT-----                 | 12 |
| Phoxinus_oxycephalus2       | -----TACATATATATGTA-----               | 14 |
| Teratoscincus_keyserlingii2 | -----ATGTATATATATATACAT-----           | 20 |
| Cyprinodon_meeki2           | -----GATAAATATTTATC-----               | 14 |
| Phoxinus_oxycephalus1       | -----TAACCTATAGGTTA-----               | 14 |
| Gavia_stellata              | -----TCACATATGTGA-----                 | 12 |
| Gavia_stellata              | -----TCACATATGTGA-----                 | 12 |
| Phoxinus_oxycephalus3       | -----ATATGCGCATAT-----                 | 12 |
| Teratoscincus_keyserlingiil | -----TATATACACATATGTGTATATA-----       | 22 |
| Aquila_pomarina             | -----ATATGTATACATAT-----               | 14 |
| Aquila_clanga               | -----ATATGTATACATAT-----               | 14 |
| Aquila_nipalensis           | -----ATATGTATACATAT-----               | 14 |
| Porichthys_myriaster        | -----TATGTACTAGTACATA-----             | 16 |
| Apeltes_quadracus           | -----CATACATGTACTTCAAAGTACATGTATG----- | 28 |
| Raja_porosal                | -----TATATAGTACTATATA-----             | 16 |
| Macaca_nigra                | -----TATATAGTACTATATA-----             | 16 |
| Macaca_fascicularis         | -----ATATATAGTACTATATAT-----           | 18 |
| Macaca_arctoides            | -----ATATATAGTACTATATAT-----           | 18 |
| Macaca_fascicularis         | -----ATATATAGTACTATATAT-----           | 18 |
| ruler                       | 1.....10.....20.....30.....            |    |

Species of monkeys showing contraction of palindrome

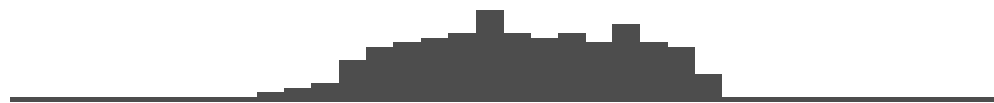

CLUSTAL X (1.81) MULTIPLE SEQUENCE ALIGNMENT of short and long palindomes found in veterbrates

Page 3 of 3

|                       |                             |    |
|-----------------------|-----------------------------|----|
| Ovis_aries            | -----TATAAAGTACTTTTATA----- | 16 |
| Latimeria_menadoensis | -----TAGTACGTACTA-----      | 12 |
| Cyprinodon_fontinalis | -----TTAATATATATTAA-----    | 14 |
| Cyprinodon_atrorus1   | -----TTAATATATATTAA-----    | 14 |
| 7Cyprinodon_meekil    | -----TTAATATATATTAA-----    | 14 |
| Cyprinodon_bovinus2   | -----TTAATATATATTAA-----    | 14 |
| Megupsilon_aporus     | -----TTAATATATATTAA-----    | 14 |
| Crax_globulosa        | -----CTCTCTAGAGAG-----      | 12 |
| Pauxi_unicornis       | -----CTCTCTAGAGAG-----      | 12 |
| Mitu_mitu             | -----CTCTCTAGAGAG-----      | 12 |
| Nothocrax_urumutum    | -----CTCTCTAGAGAG-----      | 12 |
| Chamaepetes_goudotii  | -----CTCTCTAGAGAG-----      | 12 |
| Pungitius_pungitius   | -----TTCACGCGTGAA-----      | 12 |
| ruler                 | 1.....10.....20.....30..... |    |

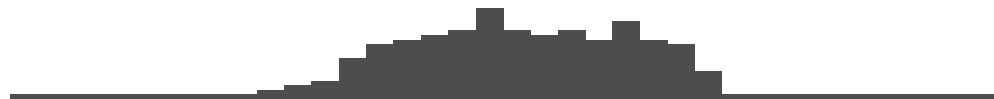

Supplement: pone.0000110.s003.pdf [file pone.0000110.s003.pdf]
