# Supplementary material for: Unusually Long Palindromes Are Abundant in Mitochondrial Control Regions of Insects and Nematodes
Source: PubMed Central journal article supplement (PMC1762429; doi:10.1371/journal.pone.0000110), 2006-12-20
Supplement: pone.0000110.s002.pdf [file pone.0000110.s002.pdf]

**P-values obtained by t-test performed on AT percent values of 8 animal groups.**

|                      | <b>Cnidaria</b> | <b>Nematoda</b> | <b>Mollusca</b> | <b>Echinodermata</b> | <b>Chelicerata</b> | <b>Crustacea</b> | <b>Insecta</b> | <b>Vertebrata</b> |
|----------------------|-----------------|-----------------|-----------------|----------------------|--------------------|------------------|----------------|-------------------|
| <b>Cnidaria</b>      |                 | <0.001          | <0.001          | <0.001               | <0.001             | <0.001           | <0.001         | <0.001            |
| <b>Nematoda</b>      |                 |                 | <0.001          | <0.001               | 0.001              | 0.037            | 0.002          | <0.001            |
| <b>Mollusca</b>      |                 |                 |                 | <b>0.192</b>         | 0.043              | 0.002            | <0.001         | 0.012             |
| <b>Echinodermata</b> |                 |                 |                 |                      | <0.001             | 0.002            | <0.001         | 0.030             |
| <b>Chelicerata</b>   |                 |                 |                 |                      |                    | 0.032            | <0.001         | <0.001            |
| <b>Crustacea</b>     |                 |                 |                 |                      |                    |                  | <0.001         | <0.001            |
| <b>Insecta</b>       |                 |                 |                 |                      |                    |                  |                | <0.001            |
| <b>Vertebrata</b>    |                 |                 |                 |                      |                    |                  |                |                   |

Unpaired t-test showed that there was significant ( $P < 0.05$ ) difference in AT percent between different animal groups except between Mollusca and Echinodermata.
